# Supplementary material for: Genomic evidence of neo-sex chromosomes in the eastern yellow robin
Source: PubMed Central journal article supplement (PMC6736294; doi:10.1093/gigascience/giz111), 2019-09-03

|                                                      |                                                                                                                                                                                                                                                                                                                                                                                                                                                                                                                                                                                                                                                                                                                                                                                                                                                                                                                                                                                                                                                                                                                                                                                                                                                                                                                                                                                                                                                                                                                                                                                                                                                                                                                                                                                                                                                                                                                                                                                                                                                                                                                                                                                                                                                                                       |                    |
|------------------------------------------------------|---------------------------------------------------------------------------------------------------------------------------------------------------------------------------------------------------------------------------------------------------------------------------------------------------------------------------------------------------------------------------------------------------------------------------------------------------------------------------------------------------------------------------------------------------------------------------------------------------------------------------------------------------------------------------------------------------------------------------------------------------------------------------------------------------------------------------------------------------------------------------------------------------------------------------------------------------------------------------------------------------------------------------------------------------------------------------------------------------------------------------------------------------------------------------------------------------------------------------------------------------------------------------------------------------------------------------------------------------------------------------------------------------------------------------------------------------------------------------------------------------------------------------------------------------------------------------------------------------------------------------------------------------------------------------------------------------------------------------------------------------------------------------------------------------------------------------------------------------------------------------------------------------------------------------------------------------------------------------------------------------------------------------------------------------------------------------------------------------------------------------------------------------------------------------------------------------------------------------------------------------------------------------------------|--------------------|
| <b>Manuscript Number:</b>                            | GIGA-D-19-00237R1                                                                                                                                                                                                                                                                                                                                                                                                                                                                                                                                                                                                                                                                                                                                                                                                                                                                                                                                                                                                                                                                                                                                                                                                                                                                                                                                                                                                                                                                                                                                                                                                                                                                                                                                                                                                                                                                                                                                                                                                                                                                                                                                                                                                                                                                     |                    |
| <b>Full Title:</b>                                   | Genomic evidence of neo-sex chromosomes in the Eastern Yellow Robin                                                                                                                                                                                                                                                                                                                                                                                                                                                                                                                                                                                                                                                                                                                                                                                                                                                                                                                                                                                                                                                                                                                                                                                                                                                                                                                                                                                                                                                                                                                                                                                                                                                                                                                                                                                                                                                                                                                                                                                                                                                                                                                                                                                                                   |                    |
| <b>Article Type:</b>                                 | Data Note                                                                                                                                                                                                                                                                                                                                                                                                                                                                                                                                                                                                                                                                                                                                                                                                                                                                                                                                                                                                                                                                                                                                                                                                                                                                                                                                                                                                                                                                                                                                                                                                                                                                                                                                                                                                                                                                                                                                                                                                                                                                                                                                                                                                                                                                             |                    |
| <b>Funding Information:</b>                          | Australian Research Council (ARC) Discovery Project (DP180102359)                                                                                                                                                                                                                                                                                                                                                                                                                                                                                                                                                                                                                                                                                                                                                                                                                                                                                                                                                                                                                                                                                                                                                                                                                                                                                                                                                                                                                                                                                                                                                                                                                                                                                                                                                                                                                                                                                                                                                                                                                                                                                                                                                                                                                     | Prof Paul Sunnucks |
|                                                      | ARC Linkage Grant (LP0776322)                                                                                                                                                                                                                                                                                                                                                                                                                                                                                                                                                                                                                                                                                                                                                                                                                                                                                                                                                                                                                                                                                                                                                                                                                                                                                                                                                                                                                                                                                                                                                                                                                                                                                                                                                                                                                                                                                                                                                                                                                                                                                                                                                                                                                                                         | Prof Paul Sunnucks |
| <b>Abstract:</b>                                     | <p><b>Background:</b> Understanding sex-biased natural selection can be greatly enhanced by access to well-annotated chromosomes including ones inherited in sex-specific fashions. The Eastern Yellow Robin (EYR) is an endemic Australian songbird inferred to have experienced climate-driven sex-biased selection and is a prominent model for studying mitochondrial-nuclear interactions in the wild. However, the lack of an EYR reference genome containing both sex chromosomes (in birds, a female bearing Z and W chromosomes) is limiting current efforts to understand the mechanisms of these processes. Here, we assemble the genome for a female EYR and use low depth (10 ×) genome resequencing data from 19 individuals of known sex to identify chromosome fragments with sex-specific inheritance.</p> <p><b>Findings:</b> MaSuRCA hybrid assembly using Nanopore and Illumina reads generated a 1.22 Gb EYR genome in 20,702 scaffolds (94.2% BUSCO completeness). Scaffolds were tested for W-linked (female-only) inheritance using a k-mer approach, and for Z-linked inheritance using median read-depth test in male and female reads (read-depths must indicate haploid female and diploid male representation). This resulted in 2,372 W-linked scaffolds (total length: 97,872,282 bp, N50: 81,931 bp) and 586 Z-linked scaffolds (total length: 121,817,358 bp, N50: 551,641 bp). Anchoring of the sex-linked EYR scaffolds to the reference genome of a female Zebra Finch revealed two categories of sex-linked genomic regions. First, 653 W-linked scaffolds (25.7 Mb) were anchored to the W sex chromosome and 215 Z-linked scaffolds (74.4 Mb) to the Z. Second, 1138 W-linked scaffolds (70.9 Mb), and 179 Z-linked scaffolds (51.0 Mb), were anchored to a large section (coordinates ~5 to ~60 Mb) of Zebra Finch chromosome 1A. The first ~5 Mb and last ~14 Mb of the reference chromosome 1A had only autosomally-behaving EYR scaffolds mapping to them.</p> <p><b>Conclusions:</b> We report a female (W-chromosome containing) EYR genome and provide genomic evidence for a neo-sex (neo-W and neo-Z) chromosome system in EYR, involving most of a large chromosome (1A) previously only reported to be autosomal in passerines.</p> |                    |
| <b>Corresponding Author:</b>                         | Han Ming Gan<br><br>AUSTRALIA                                                                                                                                                                                                                                                                                                                                                                                                                                                                                                                                                                                                                                                                                                                                                                                                                                                                                                                                                                                                                                                                                                                                                                                                                                                                                                                                                                                                                                                                                                                                                                                                                                                                                                                                                                                                                                                                                                                                                                                                                                                                                                                                                                                                                                                         |                    |
| <b>Corresponding Author Secondary Information:</b>   |                                                                                                                                                                                                                                                                                                                                                                                                                                                                                                                                                                                                                                                                                                                                                                                                                                                                                                                                                                                                                                                                                                                                                                                                                                                                                                                                                                                                                                                                                                                                                                                                                                                                                                                                                                                                                                                                                                                                                                                                                                                                                                                                                                                                                                                                                       |                    |
| <b>Corresponding Author's Institution:</b>           |                                                                                                                                                                                                                                                                                                                                                                                                                                                                                                                                                                                                                                                                                                                                                                                                                                                                                                                                                                                                                                                                                                                                                                                                                                                                                                                                                                                                                                                                                                                                                                                                                                                                                                                                                                                                                                                                                                                                                                                                                                                                                                                                                                                                                                                                                       |                    |
| <b>Corresponding Author's Secondary Institution:</b> |                                                                                                                                                                                                                                                                                                                                                                                                                                                                                                                                                                                                                                                                                                                                                                                                                                                                                                                                                                                                                                                                                                                                                                                                                                                                                                                                                                                                                                                                                                                                                                                                                                                                                                                                                                                                                                                                                                                                                                                                                                                                                                                                                                                                                                                                                       |                    |
| <b>First Author:</b>                                 | Han Ming Gan                                                                                                                                                                                                                                                                                                                                                                                                                                                                                                                                                                                                                                                                                                                                                                                                                                                                                                                                                                                                                                                                                                                                                                                                                                                                                                                                                                                                                                                                                                                                                                                                                                                                                                                                                                                                                                                                                                                                                                                                                                                                                                                                                                                                                                                                          |                    |
| <b>First Author Secondary Information:</b>           |                                                                                                                                                                                                                                                                                                                                                                                                                                                                                                                                                                                                                                                                                                                                                                                                                                                                                                                                                                                                                                                                                                                                                                                                                                                                                                                                                                                                                                                                                                                                                                                                                                                                                                                                                                                                                                                                                                                                                                                                                                                                                                                                                                                                                                                                                       |                    |
| <b>Order of Authors:</b>                             | Han Ming Gan                                                                                                                                                                                                                                                                                                                                                                                                                                                                                                                                                                                                                                                                                                                                                                                                                                                                                                                                                                                                                                                                                                                                                                                                                                                                                                                                                                                                                                                                                                                                                                                                                                                                                                                                                                                                                                                                                                                                                                                                                                                                                                                                                                                                                                                                          |                    |
|                                                      | Stephanie Falk                                                                                                                                                                                                                                                                                                                                                                                                                                                                                                                                                                                                                                                                                                                                                                                                                                                                                                                                                                                                                                                                                                                                                                                                                                                                                                                                                                                                                                                                                                                                                                                                                                                                                                                                                                                                                                                                                                                                                                                                                                                                                                                                                                                                                                                                        |                    |
|                                                      | Hernán E. Morales                                                                                                                                                                                                                                                                                                                                                                                                                                                                                                                                                                                                                                                                                                                                                                                                                                                                                                                                                                                                                                                                                                                                                                                                                                                                                                                                                                                                                                                                                                                                                                                                                                                                                                                                                                                                                                                                                                                                                                                                                                                                                                                                                                                                                                                                     |                    |

|                                                |                                                                                                                                                                                                                                                                                                                                                                                                                                                                                                                                                                                                                                                                                                                                                                                                                                                                                                                                                                                                                                                                                                                                                                                                                                                                                                                                                                                                                                                                                                                                                                                                                                                                                                                                                                                                                                                                                                                                                                                                                                                                                                                                                           |
|------------------------------------------------|-----------------------------------------------------------------------------------------------------------------------------------------------------------------------------------------------------------------------------------------------------------------------------------------------------------------------------------------------------------------------------------------------------------------------------------------------------------------------------------------------------------------------------------------------------------------------------------------------------------------------------------------------------------------------------------------------------------------------------------------------------------------------------------------------------------------------------------------------------------------------------------------------------------------------------------------------------------------------------------------------------------------------------------------------------------------------------------------------------------------------------------------------------------------------------------------------------------------------------------------------------------------------------------------------------------------------------------------------------------------------------------------------------------------------------------------------------------------------------------------------------------------------------------------------------------------------------------------------------------------------------------------------------------------------------------------------------------------------------------------------------------------------------------------------------------------------------------------------------------------------------------------------------------------------------------------------------------------------------------------------------------------------------------------------------------------------------------------------------------------------------------------------------------|
|                                                | Christopher M. Austin                                                                                                                                                                                                                                                                                                                                                                                                                                                                                                                                                                                                                                                                                                                                                                                                                                                                                                                                                                                                                                                                                                                                                                                                                                                                                                                                                                                                                                                                                                                                                                                                                                                                                                                                                                                                                                                                                                                                                                                                                                                                                                                                     |
|                                                | Paul Sunnucks                                                                                                                                                                                                                                                                                                                                                                                                                                                                                                                                                                                                                                                                                                                                                                                                                                                                                                                                                                                                                                                                                                                                                                                                                                                                                                                                                                                                                                                                                                                                                                                                                                                                                                                                                                                                                                                                                                                                                                                                                                                                                                                                             |
|                                                | Alexandra Pavlova                                                                                                                                                                                                                                                                                                                                                                                                                                                                                                                                                                                                                                                                                                                                                                                                                                                                                                                                                                                                                                                                                                                                                                                                                                                                                                                                                                                                                                                                                                                                                                                                                                                                                                                                                                                                                                                                                                                                                                                                                                                                                                                                         |
| <b>Order of Authors Secondary Information:</b> |                                                                                                                                                                                                                                                                                                                                                                                                                                                                                                                                                                                                                                                                                                                                                                                                                                                                                                                                                                                                                                                                                                                                                                                                                                                                                                                                                                                                                                                                                                                                                                                                                                                                                                                                                                                                                                                                                                                                                                                                                                                                                                                                                           |
| <b>Response to Reviewers:</b>                  | <p>Editor:</p> <p>-In your revised manuscript, please include a citation to your upcoming GigaDB dataset (including the DOI link) to your reference list, and cite this in the data availability section and elsewhere in the manuscript, where appropriate.<br/>         -In the data availability section, please write something along the lines of " Supporting data, including the genome assembly, annotations, and [... mention other data types...] are available via the GigaScience database, GigaDB [xx]."</p> <p>Added GigaDB in the data availability citation as per recommended format. (DOI yet to be made available)</p> <p>Reviewer #1:</p> <p>-I did not understand the reasoning behind the "evolutionary strata" argument in Figure 5C. I only realized what the point of this analysis was when I read the suggestion by Reviewer 3. Please explain this better in the ms.</p> <p>We have adjusted the text accordingly:<br/>         One expectation under sex chromosome evolution is the development of evolutionary strata – regions of suppressed recombination identified by spatial clusters of Z-W orthologs with similar divergence estimates [43].</p> <p>-----</p> <p>-Line 54: "sex-linked genome region". genomic or regions.<br/>         Genome region -&gt; genomic regions</p> <p>-----</p> <p>-line 174: Remove underlined ".".<br/>         Removed</p> <p>-----</p> <p>-line 264: "Surprisingly,A substantial". Fix capital "A"..<br/>         Fixed</p> <p>-----</p> <p>Reviewer #2:</p> <p>Line 264 - "A" should be lowercase<br/>         Fixed</p> <p>-----</p> <p>Line 326 - Fix "...to decrease..."<br/>         Fixed</p> <p>-----</p> <p>Line 327 - More appropriate citations would be Charlesworth &amp; Charlesworth 2000 Phil Trans Roy Soc B and Charlesworth 1994 Genet Res. Also, note that reduced purifying selection due to the reduced effective population sizes of the W/Y chromosomes is only one of the reasons why we expect accumulation of deleterious mutations, along with Mueller's ratchet and hitchhiking (see Bachtrog 2006 Current Opinion in Genetics &amp; Development).</p> |

|                                                                                                                                                                                                                                                                                                                                                                                                                                    |                                                                                                                                                                                                                                                                                                                                                                                                                                                                                                                                                                                                                                                                                                           |
|------------------------------------------------------------------------------------------------------------------------------------------------------------------------------------------------------------------------------------------------------------------------------------------------------------------------------------------------------------------------------------------------------------------------------------|-----------------------------------------------------------------------------------------------------------------------------------------------------------------------------------------------------------------------------------------------------------------------------------------------------------------------------------------------------------------------------------------------------------------------------------------------------------------------------------------------------------------------------------------------------------------------------------------------------------------------------------------------------------------------------------------------------------|
|                                                                                                                                                                                                                                                                                                                                                                                                                                    | <p>Citations added. We also added 'along with Mueller's ratchet and hitchhiking'.</p> <hr/> <p>Line 345 - Remove comma (or insert comma between "approaches" and "followed" in previous line)<br/> Inserted comma in previous line.</p> <hr/> <p>Line 357 - Fix to "neoZ-1A differences"<br/> Fixed</p> <hr/> <p>Figure 2A - This figure is not currently cited in the manuscript</p> <p>Did a search in Microsoft word and confirm that Figure 2A is cited in the manuscript.</p> <p>".....genome profiling based on Jellyfish2-calculated k-mer frequency (k=25) that estimated a genome size of 993 Mb with 1.12% heterozygosity for EYR054 (Figure 2A) [22-24]. We used MaSuRCA v3.2.4...."</p> <hr/> |
| <b>Additional Information:</b>                                                                                                                                                                                                                                                                                                                                                                                                     |                                                                                                                                                                                                                                                                                                                                                                                                                                                                                                                                                                                                                                                                                                           |
| <b>Question</b>                                                                                                                                                                                                                                                                                                                                                                                                                    | <b>Response</b>                                                                                                                                                                                                                                                                                                                                                                                                                                                                                                                                                                                                                                                                                           |
| Are you submitting this manuscript to a special series or article collection?                                                                                                                                                                                                                                                                                                                                                      | No                                                                                                                                                                                                                                                                                                                                                                                                                                                                                                                                                                                                                                                                                                        |
| <p><b>Experimental design and statistics</b></p> <p>Full details of the experimental design and statistical methods used should be given in the Methods section, as detailed in our <a href="#">Minimum Standards Reporting Checklist</a>. Information essential to interpreting the data presented should be made available in the figure legends.</p> <p>Have you included all the information requested in your manuscript?</p> | Yes                                                                                                                                                                                                                                                                                                                                                                                                                                                                                                                                                                                                                                                                                                       |
| <p><b>Resources</b></p> <p>A description of all resources used, including antibodies, cell lines, animals and software tools, with enough information to allow them to be uniquely identified, should be included in the Methods section. Authors are strongly encouraged to cite <a href="#">Research Resource Identifiers</a> (RRIDs) for antibodies, model organisms and tools, where possible.</p>                             | Yes                                                                                                                                                                                                                                                                                                                                                                                                                                                                                                                                                                                                                                                                                                       |

|                                                                                                                                                                                                                                                                                                                                                                                                                                                                                                                                                         |            |
|---------------------------------------------------------------------------------------------------------------------------------------------------------------------------------------------------------------------------------------------------------------------------------------------------------------------------------------------------------------------------------------------------------------------------------------------------------------------------------------------------------------------------------------------------------|------------|
| <p>Have you included the information requested as detailed in our <a href="#">Minimum Standards Reporting Checklist</a>?</p>                                                                                                                                                                                                                                                                                                                                                                                                                            |            |
| <p><b>Availability of data and materials</b></p> <p>All datasets and code on which the conclusions of the paper rely must be either included in your submission or deposited in <a href="#">publicly available repositories</a> (where available and ethically appropriate), referencing such data using a unique identifier in the references and in the “Availability of Data and Materials” section of your manuscript.</p> <p>Have you have met the above requirement as detailed in our <a href="#">Minimum Standards Reporting Checklist</a>?</p> | <p>Yes</p> |

[Click here to view linked References](#)

1 **Genomic evidence of neo-sex chromosomes in the Eastern Yellow Robin**

2

3 Han Ming Gan<sup>1,2\*</sup>, Stephanie Falk<sup>3</sup>, Hernán E. Morales<sup>4</sup>, Christopher M. Austin<sup>1,2</sup>, Paul  
4 Sunnucks<sup>3</sup>, Alexandra Pavlova<sup>3\*</sup>

5

6 <sup>1</sup> Centre for Integrative Ecology, School of Life and Environmental Sciences, Deakin University,  
7 Geelong, Victoria, Australia

8 <sup>2</sup> Deakin Genomics Centre, Deakin University, Geelong, Victoria, Australia

9 <sup>3</sup> School of Biological Sciences, Monash University, Clayton Campus, Clayton, Victoria, Australia

10 <sup>4</sup> Centre for Marine Evolutionary Biology, Department of Marine Sciences, University of  
11 Gothenburg, Göteborg, Sweden

12

13 **\* Corresponding author:**

14 Name: Han Ming Gan, PhD

15 Address: Building KA4, School of Life and Environmental Sciences, Deakin University,  
16 Waurn Ponds, Victoria 3220, Australia

17 Phone: 0490786277

18 Email: [han.gan@deakin.edu.au](mailto:han.gan@deakin.edu.au)

19

20 Name: Alexandra Pavlova

21 Address: School of Biological Sciences

22 Monash University, Clayton Campus

23 Clayton Victoria 3800

24 Phone: 0399055902

25 Email: [alexandra.pavlova@monash.edu](mailto:alexandra.pavlova@monash.edu)

26

27

28

29

30

31

32

33

34

35 **Abstract**

36

37 **Background:** Understanding sex-biased natural selection can be greatly enhanced by access to  
38 well-annotated chromosomes including ones inherited in sex-specific fashions. The Eastern  
39 Yellow Robin (EYR) is an endemic Australian songbird inferred to have experienced climate-  
40 driven sex-biased selection and is a prominent model for studying mitochondrial-nuclear  
41 interactions in the wild. However, the lack of an EYR reference genome containing both sex  
42 chromosomes (in birds, a female bearing Z and W chromosomes) is limiting current efforts to  
43 understand the mechanisms of these processes. Here, we assemble the genome for a female EYR  
44 and use low depth (10 ×) genome resequencing data from 19 individuals of known sex to identify  
45 chromosome fragments with sex-specific inheritance.

46

47 **Findings:** MaSuRCA hybrid assembly using Nanopore and Illumina reads generated a 1.22 Gb  
48 EYR genome in 20,702 scaffolds (94.2% BUSCO completeness). Scaffolds were tested for W-  
49 linked (female-only) inheritance using a *k*-mer approach, and for Z-linked inheritance using  
50 median read-depth test in male and female reads (read-depths must indicate haploid female and  
51 diploid male representation). This resulted in 2,372 W-linked scaffolds (total length: 97,872,282  
52 bp, N<sub>50</sub>: 81,931 bp) and 586 Z-linked scaffolds (total length: 121,817,358 bp, N<sub>50</sub>: 551,641 bp).  
53 Anchoring of the sex-linked EYR scaffolds to the reference genome of a female Zebra Finch  
54 revealed two categories of sex-linked genomic regions. First, 653 W-linked scaffolds (25.7 Mb)  
55 were anchored to the W sex chromosome and 215 Z-linked scaffolds (74.4 Mb) to the Z. Second,  
56 1138 W-linked scaffolds (70.9 Mb), and 179 Z-linked scaffolds (51.0 Mb), were anchored to a  
57 large section (coordinates ~5 to ~60 Mb) of Zebra Finch chromosome 1A. The first ~5 Mb and last  
58 ~14 Mb of the reference chromosome 1A had only autosomally-behaving EYR scaffolds mapping  
59 to them.

60

61 **Conclusions:** We report a female (W-chromosome containing) EYR genome and provide genomic  
62 evidence for a neo-sex (neo-W and neo-Z) chromosome system in EYR, involving most of a large  
63 chromosome (1A) previously only reported to be autosomal in passerines.

64

65

66 **Keywords:** Eastern Yellow Robin, *Eopsaltria australis*, passerine, songbird, genome, sex  
67 chromosome, W-chromosome, neo-W, neo-Z

## 68 **Data description**

69  
70 Wildlife species that have genomic variation distributed heterogeneously through environmental  
71 and geographic space can be excellent models for studying evolutionary processes under natural  
72 conditions. Eastern Yellow Robin (EYR, NCBI:txid44318), *Eopsaltria australis*, is a common  
73 endemic eastern Australian songbird (Figure 1) that shows geographically discordant patterns of  
74 mitochondrial and nuclear genome variation. Whereas nuclear DNA variation in EYR is structured  
75 mainly north-to-south, its two mitochondrial lineages (mitolineages) occur in contrasting climates  
76 in an east-west (coast-to-inland) direction, with a narrow contact zone between them, despite  
77 ongoing male-mediated gene flow [1]. This pattern is inferred to have arisen when EYR  
78 experienced two instances of climate-driven mitochondrial introgression into different nuclear  
79 backgrounds: from the northern population into the southern through the inland, and from the  
80 southern into the northern population along the coast [2]. Because mitogenome divergence is  
81 mirrored by a fraction of the EYR nuclear genome that maps to the chromosome 1A of Zebra  
82 Finch and is enriched for genes with mitochondrial functions, each inferred mitochondrial  
83 introgression is hypothesized to have been accompanied by co-introgression of a co-evolved  
84 nuclear region [3]. Accordingly, the species has been highlighted as an exceptional model in the  
85 emerging field of ‘mitonuclear ecology’, which addresses evolutionary interactions between  
86 mitochondrial and nuclear genomes and their products [4].

87       Whereas progress on understanding mitonuclear interactions in EYR has been made by  
88 mapping genomic reads to a male Zebra Finch *Taeniopygia guttata* reference genome [5], the ~40  
89 million years of evolution between the two species limits the assumptions that can be made about  
90 the degree of synteny of their genome organization. Moreover, the male reference lacks the  
91 female-specific W chromosome in birds. Nuclear genomic architecture (for example,  
92 concentrations of genes with mitochondrial functions that are subject to suppressed  
93 recombination), has considerable potential to be a driver of mitonuclear evolution [6].  
94 Furthermore, female-specific selection has been inferred for EYR, based on fine-scale spatial  
95 separation of mitolineage distributions and their correlation with climate, despite male-biased gene  
96 flow in a species with female-biased dispersal [1]. Accordingly, genomic architecture with the  
97 potential to impact the sexes differently could be a key player in mitonuclear evolution in this  
98 species. Thus to test among alternative hypotheses concerning mechanisms of potential co-  
99 evolution between elements of the nuclear genome and maternally-transmitted mtDNA, reference  
100 sequences of both sex chromosomes are required. For example, the female-specific W-  
101 chromosome is necessarily co-inherited with mitochondrial DNA, and a species could experience

102 evolution so that W-chromosome bore genes relevant to mitochondrial function [1]. Substantial  
103 female-specific gene regions are known from birds, notably neo-sex chromosome systems that can  
104 provide females with gene sequences unavailable to males [7, 8].

105 Using a combination of Illumina and Nanopore reads, which have been shown to produce  
106 contiguous genome assemblies [9-12], we assembled a female inland EYR reference genome and  
107 utilized population genomic data from populations harbouring only inland mitochondrial lineages  
108 [13] to identify and annotate W and Z sex chromosomes. This procedure could also detect sex-  
109 linked chromosomes other than the typical W and Z avian sex chromosomes such as neo-sex  
110 chromosomes (caused by fusions between autosomal and sex chromosome elements) that are  
111 uncommon but known in birds, notably throughout the Sylvioidea, and in a honeyeater [7, 8, 14-  
112 16]

113

#### 114 **Sample collection, library construction and sequencing**

115

116 Two EYR females, EYR054 and EYR056, were captured at Stuart Mill, western Victoria in the  
117 same net on 6<sup>th</sup> of April 2009, as part of another project [17, 18]. DNA was extracted from 40  $\mu$ L  
118 of blood using a Qiagen DNAeasy Blood and Tissue Kit. A standard paired-end Illumina library  
119 was constructed from 100 ng of QSonica-fragmented (~ 350 bp fragment size) EYR054 DNA  
120 using the NEBUltra Illumina Library Preparation kit (New England Biolabs, Ipswich, MA). The  
121 library was quantified with a TapeStation 4000 (Agilent) and sequenced on the Novaseq6000 (2  $\times$   
122 150 bp run configuration) at the Deakin Genomics Centre. Two Oxford Nanopore sequencing  
123 libraries were constructed from G-tube fragmented (~8 kb) EYR054 gDNA using the LSK108  
124 library preparation kit. Sequencing was performed on two MinION R9.4.1 flowcells for 48 hours  
125 followed by fast5 base-calling using Albacore v2.0.1. A total of 6.63 Gb Nanopore data in 916,218  
126 reads ( $N_{50} = 10,224$  bp) were generated after adapter-trimming using Porechop v0.2.3  
127 (<https://github.com/rrwick/Porechop>). Nanopore reads used for this study had 13% error rate,  
128 estimated based on mean pairwise sequence similarity of 87% (median= 89%) between Nanopore  
129 reads and the assembled EYR genome, aligned using Minimap2 [19]. The DNA of EYR056 was  
130 used to construct a mate-pair library with an insert size of 1 kb and sequenced by BGI for earlier  
131 studies [18]. EYR054 is similar genetically to EYR056 according to whole mitogenomes,  
132 microsatellites, and being female contemporaries in an area of the species' range where only the  
133 inland mitolineage occurs, in an isolated habitat patch characterized by high local genetic  
134 relatedness [3, 18, 20].



135 For low (~10 ×) depth whole genome resequencing, 10 female and 9 male EYR individuals  
136 bearing inland mitogenomes (EYR-A) were selected from northern (n=9) and southern (n=10)  
137 populations [2, 13] away from the contact zone between the inland and coastal mitolineages  
138 (Supplemental Table 1). Prior to Illumina sequencing, EYR individuals were genetically sexed  
139 based on the intron length-variation of homologous sections of CHD (chromo-helicase-DNA-  
140 binding) genes located on W (female-limited) and Z (occurs in both sexes) chromosomes [21].  
141 These fragments have been sequenced previously for EYR for both sexes [1]. DNA extraction  
142 from 16 blood samples and five tissues (Supplemental Table 1) was performed using a Qiagen  
143 DNAeasy extraction kit. Illumina library construction and whole genome sequencing were  
144 performed at the Deakin Genomics Centre using the methods described above, generating an  
145 average of 17 Gb (min = 12 Gb; max = 31 Gb) sequencing output per sample (Supplemental Table  
146 1).

147

#### 148 **Genome size estimation, hybrid *de novo* assembly and annotation**

149

150 Raw Illumina EYR054 reads were poly-G, adapter- and quality trimmed using fastp v0.18.0 [22].  
151 The trimmed reads were used for genome profiling based on Jellyfish2-calculated *k*-mer frequency  
152 (k=25) that estimated a genome size of 993 Mb with 1.12% heterozygosity for EYR054 (Figure  
153 2A) [22-24]. We used MaSuRCA v3.2.4 (MaSuRCA, RRID:SCR\_010691) [25] to perform a  
154 hybrid assembly of the EYR054 Nanopore and poly-G trimmed Illumina reads followed by gap-  
155 closing with Sealer v2.0.2 [26]. For the MaSuRCA assembly, Illumina reads were first error-  
156 corrected and used to construct contigs using the de Bruijn graph approach. These contigs were  
157 then used to error-correct the Nanopore long reads generating “mega reads” contigs and used for  
158 Overlap-Layout-Consensus assembly. Subsequently, the MaSuRCA hybrid assembly was gap-  
159 closed with Sealer v2.0.2 using Illumina paired-end reads from the same individual. Given that  
160 EYR056 and EYR054 are from the same population away from the hybrid zone (Harrisson et al.  
161 2012, Morales et al. 2018) and thus likely possess similar versions of chromosomes, the EYR054  
162 assembly was further scaffolded with mate-pair data from EYR056 using BESST [27] to generate  
163 the final assembly for subsequent analyses (Table 1). Using mate-pair data improved the assembly  
164 N<sub>50</sub> from 585 kb to 987 kb. The Sealer-gap-closed EYR054-only assembly is also made available  
165 in the GigaDB [28], should the future work on this species require single-individual assembly.

166 BUSCO v3 (BUSCO, RRID:SCR\_015008) [29] assessment of the assembled genome  
167 based on the avian protein database (aves\_odb9), indicates 94.2% genome completeness with a  
168 low level of duplicated genes (Table 1). Prior to gene prediction, the genome was masked for

169 repeats using RepeatModeler (RepeatModeler, RRID:SCR\_015027) v1.0.11 and RepeatMasker  
170 (RepeatMasker, RRID:SCR\_012954) v4.0.7 [30, 31]. The soft-masked genome (15.77% masked,  
171 Table 1) along with the reference proteome of a male Collared Flycatcher [32] were used as the  
172 input for BRAKER2 annotation [33], resulting in the prediction of 23,905 genes. The Collared  
173 Flycatcher proteome was used here in preference to Zebra Finch because the former has greater  
174 protein similarity to EYR.

175

## 176 **Identification of sex chromosome scaffolds**

177

178 Scaffolds inherited in sex-specific fashions ('sex-linked', 'W-linked' or 'Z-linked') were identified  
179 using two methods (explained below) applied to sequence data obtained from 10 female and 9  
180 male EYR individuals as detailed above. Paired-end reads for each re-sequenced male and female  
181 were poly-G, quality- and adapter-trimmed using fastp (default setting) [22]. The trimmed reads  
182 were mapped to the EYR genome using Bowtie2 (Bowtie, RRID:SCR\_005476) v2.3.4 [34]. High  
183 mapping rates ranging from 97.82 to 98.53% were observed across all 19 individuals, indicating  
184 robust assembly of the female EYR genome. The read mapping quality reported by Bowtie2 is  
185 relatively constant (MapQ >30) across the assembly albeit with lower quality in the repetitive  
186 regions as short reads will not be able to uniquely map to these regions. Subsequently, 90 million  
187 mapped PE reads were subsampled from each individual (to equalize coverage across individuals)  
188 and used to estimate for each individual the median read-depth for each scaffold, and the fraction  
189 of the length of each scaffold that was covered by reads, using BAMStat04 as implemented in the  
190 jvarkit package [35, 36].

191 Genome-wide identification of sex-linked scaffolds based on pooled male and female reads  
192 could be compromised if any individuals had their sexes mis-assigned. Accordingly, to confirm the  
193 sex of the individual to which each set of sequence data was ascribed, the read-depth profiles for  
194 all 19 EYR were assessed for the CHD sexing region noted above. BLASTN was used to align the  
195 CHD-W and CHD-Z nucleotide sequences (GenBank accession KC466840 - KC466844 CHD-W  
196 and KC466845 - KC466853 CHD-Z) to two separate, long scaffolds (W chromosome scaffold:  
197 QKXG01001703.1 - 310,213 bp; Z chromosome scaffold: QKXG01001459.1 - 211,357 bp). For  
198 comparison, an autosomal scaffold, QKXG01002030.1 (3,864,097 bp) was identified that  
199 contained a fragment of the single-copy autosomal GAPDH (glyceraldehyde-3-phosphate  
200 dehydrogenase) gene, sequenced previously for EYR (Genbank accession KC466694- KC466739)  
201 [1]. For the Z chromosome scaffold, a median read-depth centered on ~5× (haploid depth) was  
202 observed in females, and ~10× (diploid) in males, while for the W chromosome fragment it was

203 ~5× (haploid) in females and ~0× (absent) in males; ~10× diploid depth was observed for the  
204 autosomal scaffold in both sexes (Figure 2B).

205 BAM files from individual EYR were merged by sex using samtools v1.9 [37] to generate  
206 one pooled alignment BAM file per sex. A histogram of read-depth frequency for each sex was  
207 then generated using ‘samtools depth’ to estimate the read-depth cut-off for the identification of  
208 candidate W- and Z-linked scaffolds (Figure 2C). The expected diploid depth for each sex was  
209 estimated based on the peak observed read-depth (male = 77×; female = 83×, Figure 2C). A minor  
210 peak corresponding to haploid read-depth (~40×) was observed for females but not males,  
211 consistent with females being hemizygous for sex-linked regions (Figure 2C). A strong peak of  
212 low read-depth sequences (< 5×) was seen only for males, consistent with them lacking a W  
213 chromosome (Figure 2C).

214 To identify candidate W-linked scaffolds, we applied two established approaches with  
215 complementary strengths that take advantage of sequence data being available for each sex. First,  
216 we used a differential mapping approach, based on the expectation that a W-linked scaffold should  
217 exhibit zero median read-depth in males, with a more than 75% of the scaffold having female reads  
218 mapping to it [7, 8]. Second, we used the YGS (‘Y chromosome Genome Scan’) *k*-mer approach,  
219 designed for detecting W- or Y-linked regions [38]. The *k*-mer approach removes identical  
220 repetitive sequences that might lead to false-positive matches to W-linked regions while retaining  
221 useful information from unique variants of repetitive regions: this is an advantageous attribute in  
222 the face of the elevated repetitiveness expected of W chromosome sequences [38]. The *k*-mer  
223 approach was implemented as follows. For the pooled male reads, pooled female reads and the  
224 female EYR genome assembly dataset, separate lists were built of all overlapping 16-bp sequences  
225 (‘16-mers’): *k*=16 was chosen on the basis of genome size, and empirical validation that it  
226 produced bimodal frequency distributions of *k*-mer presences in larger (>1 Gb) genomes [38].  
227 Then, scaffolds from the assembled female genome are assumed to be W-linked if >75% of their  
228 single-copy *k*-mers are absent in the pooled male reads but present in both of the female genome  
229 and pooled female reads.

230 Together, the two approaches identified 2,372 candidate W-linked scaffolds (total length of  
231 97.87 Mb) that were used for downstream analyses. A great majority (1,952, 82.3 %, amounting to  
232 86.32 Mb) of the candidate W-linked scaffolds were identified by both approaches, with 174 (7.3  
233 %, 2.64 Mb) being exclusive to the *k*-mer approach, and 246 (10.4 %, 8.91 Mb) found only by the  
234 differential mapping approach. Inspection of the repetitiveness in the candidate W-linked scaffolds  
235 identified only by the *k*-mer approach indicates that they are 80% repetitive (total repeat  
236 length/total sequence length × 100%), consistent with the high sensitivity of *k*-mer approach in

237 identifying repetitive sex-linked scaffolds [38]. In contrast, the candidate W-linked scaffolds found  
238 by the differential mapping approach alone were only 32.6% repetitive.

239 Since Z-linked scaffolds are present in males and females, it is not possible to utilize the  
240 YGS *k*-mer approach to identify candidates. Thus, we identified putative Z-linked scaffolds on the  
241 basis of differences in read-depth between males and females, similar to the differential mapping  
242 method for W-linked scaffold discovery outlined above. To allow for variation in sequencing  
243 depth, we conservatively defined a candidate Z-linked scaffold as one exhibiting more than 58×  
244 median read-depth in males (i.e. 0.75 times the observed male diploid read-depth of 77×) and less  
245 than 62× median read-depth in females (i.e. 1.5 times the observed female haploid read-depth of  
246 41.5×). Scaffolds passing these thresholds were further filtered to retain only those having both  
247 male and female reads mapping to > 75% of the scaffold length. This resulted in the identification  
248 of 586 candidate Z-linked scaffolds with a total length of 121.8 Mb and N<sub>50</sub> of 551.6 kb.

249 The total lengths of W-linked scaffolds (97.87 Mb) and Z-linked scaffolds = 121.82 Mb are  
250 much greater than expected from the typical sizes of sex chromosomes in Passerida, of which EYR  
251 is a member (e.g. in Xu *et al.* 2019 [39], Passerida W chromosomes range from 3.37-4.75 Mb and  
252 Z chromosomes range from 68.8-74.7 Mb) [39]. These observations raised the possibility of the  
253 presence of a neo-sex chromosome system, and hence it was of great interest to compare the sex-  
254 linked regions to a well-annotated reference genome, as follows.

255

## 256 **Genomic evidence of neo-sex chromosomes in Eastern Yellow Robin**

257

258 To assess the accuracy of our approaches for detecting sex-linked regions known in related  
259 reference genomes, and to test for possible neo-sex chromosomes, the candidate W- and Z-linked  
260 scaffolds were separately anchored to the female Zebra Finch genome (bTaeGut2:  
261 [https://vgp.github.io/genomeark/Taeniopygia\\_guttata/](https://vgp.github.io/genomeark/Taeniopygia_guttata/), accessed on 19<sup>th</sup> December 2018) using  
262 RaGoo v1.0 (with default settings) [40]. A total of 215 Z-linked scaffolds (74.4 Mb, ) were  
263 anchored to the Zebra Finch Z chromosome, and 653 W-linked scaffolds (25.7 Mb) to the Zebra  
264 Finch W chromosome. Surprisingly, a substantial proportion of candidate W-linked (n=1138, 70.9  
265 Mb) and Z-linked (n=179, 51.0 Mb) scaffolds were also anchored to the autosomal Zebra Finch  
266 chromosome 1A. Thus, each sex-linked scaffold anchored to one of three female Zebra Finch  
267 chromosomes: W, Z or chromosome 1A. Using the entire EYR draft genome assembly as the  
268 RaGoo input led to the anchoring of several W- and Z-linked scaffolds with the best hits to the  
269 Zebra finch chromosome 1A, resulting in a substantially larger pseudomolecule for chromosome  
270 1A (143.6 Mb), a length that is nearly double that of the Zebra Finch chromosome 1A (71.64 Mb)

271 which suggests the presence of two separate sex-linked versions of chromosome 1A in EYR (Fig.  
272 3). By re-anchoring the EYR scaffolds in the absence of first the candidate W-linked and then the  
273 candidate Z-linked scaffolds, two distinct versions of a chromosome 1A pseudomolecule were  
274 recovered that we designated putative neoZ-1A and neoW-1A chromosomes and used for  
275 subsequent analyses.

276 To assess the robustness of the sex-based scaffold assignment approach, and to check the  
277 sex-specific read-depth and length coverage along the putative neo-sex chromosomes involving  
278 chromosome 1A (which we refer to as “pseudomolecules neoW-1A (Fig. 3 Chr1A: pink bar) and  
279 neoZ-1A (Fig. 3 Chr1A: light blue bar)”), pooled female and male reads were mapped to the  
280 constructed EYR Z, W, autosomal chromosome 5, and neoZ-1A and neoW-1A pseudomolecules.  
281 The mean read-depth in 100 kb non-overlapping sliding windows was calculated using the  
282 ‘coverage’ command in bedtool v2.25.0 [41] and visualized with ggplot2 in R v3.5.2 [42]. The  
283 mean read-depth across the pseudomolecules was largely consistent with the scaffold sex-  
284 assignment i.e. zero depth for males and haploid for females for the W chromosome (Figure 4C)  
285 and neoW-1A (Figure 4A), diploid depth for males and haploid for females for the Z chromosome  
286 (Figure 4D) and neoZ-1A (Figure 4B), and diploid depth for both sexes for autosomal  
287 chromosome 5 (Fig. 4E). In contrast to the W and Z chromosomes, several distinct genomic  
288 regions with read-coverage consistent with that of an autosomal chromosome (Fig 4E) were  
289 observed for neoW-1A (Figure 4A) and neoZ-1A (Figure 4B), mostly at the pseudomolecule  
290 termini.

291

### 292 **Identification of chromosome 1A-anchored gametologous gene pairs**

293 Using FastANI, we calculated the pairwise sequence identity between the neoW-1A or  
294 neoZ-1A pseudomolecule and the Zebra Finch chromosome 1A [43] and found that both exhibited  
295 substantial sequence similarity (calculated mean nucleotide identity of 86%) across the whole of  
296 Zebra Finch chromosome 1A (Figure 5A, B). NeoW-1A exhibited ~ 20 Mb greater assembled  
297 length (92.5 Mb) than did neoZ-1A (72.5 Mb) (Figure 5 A, B). Accumulation of repeats  
298 contributed to this: 36.6% of the EYR neoW-1A sequence was characterized as repetitive by  
299 RepeatMasker, while this value is only 10% for the EYR neoZ-1A sequence. One expectation  
300 under sex chromosome evolution is the development of evolutionary strata – regions of suppressed  
301 recombination identified by spatial clusters of Z-W orthologs with similar divergence estimates  
302 [44]. Accordingly, using FastANI, we calculated the pairwise sequence identity between EYR  
303 neoW-1A and neoZ-1A in a non-overlapping sliding window of 10 kb. By aligning the putative  
304 neoW-1A to the neoZ-1A, we observed high (mostly >90%) pairwise sequence identity throughout

305 the pseudomolecule (Figure 5C). However, there was considerable heterogeneity in absolute  
306 sequence similarity, with zones of ~100 %, ~98 %, ~95 %, and ~92 % identity clumped along the  
307 pseudomolecules, suggestive of evolutionary strata (Figure 5C) [44].

308 Orthologous genes shared between the EYR and Collared Flycatcher (higher protein  
309 similarity to EYR compared to Zebra Finch) were inferred using OrthoFinder2 [45]. Of the 957  
310 genes located on the Collared Flycatcher chromosome 1A, 725 formed a one-to-one (n=513) or  
311 one-to-many (n=212) orthologous group with the EYR genes located on the neoZ-1A or neoW-1A  
312 pseudomolecule. We restricted the ortholog analysis to only genes predicted from the sex-linked  
313 scaffolds (identified based on EYR scaffold assignment) since the “autosomal-behaving” scaffolds  
314 on the neoZ-1A and neoW-1A pseudomolecules (Figure 4A and B) may consist of unassigned sex-  
315 linked, recombining sex-linked (collapsed into a single scaffold) or truly autosomal scaffolds that  
316 will affect gametologous pairing. This resulted in the identification of 419 Z-linked genes on EYR  
317 neoZ-1A pseudomolecule and 221 W-linked orthologs on neoW-1A, to a total of 488 different sex-  
318 linked genes. Among these were 148 putative gametologous gene pairs (i.e. homologs with  
319 sufficiently low recombination for one version to be identifiably W- and one Z-linked) between  
320 EYR neoW- and neoZ-1A (Supplemental Table 2). The fewer number of W-linked EYR genes that  
321 formed orthologous group with the Collared Flycatcher chromosome 1A genes compared to that of  
322 Z-linked EYR genes may be due to the more fragmented assembly and higher repetitiveness of W-  
323 linked EYR scaffolds that precludes the accurate annotation of genes in the W-linked scaffolds  
324 when using the default BRAKER2 annotation settings [46]. It is also possible that W-linked EYR  
325 genes on chromosome 1A have diverged, been lost or degraded beyond detection, as expected  
326 under sex chromosome evolution [44].

327 Neo-sex chromosomes have reduced effective population size relative to the autosomes that  
328 contribute to them: this is expected to decrease the effectiveness of purifying selection, especially  
329 when compounded by reduced recombination [47-50]. These effects, along with Mueller's ratchet  
330 and hitchhiking, should promote the accumulation of deleterious mutations, commonly revealed as  
331 elevated non-synonymous to synonymous (dN/dS) ratios, particularly for sex-limited  
332 chromosomes such as the neo-W in birds [7, 8, 51]. To calculate the dN/dS ratios for EYR neo-sex  
333 gametologous gene pairs, protein alignment was first performed for all 148 putative neo-sex  
334 gametologous gene pairs with their respective Collared Flycatcher orthologs using Clustal Omega  
335 v1.2.1 [52] followed by codon-based alignment with pal2nal (-nogap option to remove gaps and  
336 inframe stop codons) [53]. The pal2nal output for each orthologous group was used to calculate  
337 dN/dS ratios via codeml in paml v4.9i package [54]. When the Collared Flycatcher orthologous 1A  
338 genes were used as the reference for each comparison, 120 out of 148 the neoW-1A gametologs

339 exhibited higher dN/dS than their neoZ-1A gametologous partners (Wilcoxon paired samples  
340 signed rank test,  $p = 3.9e-14$ ; Fig. 5 D).

341

## 342 **Conclusion**

343

344 We report a hybrid genome assembly using Nanopore and Illumina reads of a female Eastern  
345 Yellow Robin (EYR), the first published genome for the family Petroicidae. The identification of  
346 sex-linked scaffolds using a combination of read-depth and *k*-mer YGS approaches, followed by  
347 chromosomal anchoring to the genome of a female Zebra Finch, provided strong evidence for the  
348 presence of a neo-sex chromosome system in EYR involving most of chromosome 1A. The  
349 inferred neoW-1A pseudomolecule showed the characteristics expected of a sex-limited neo-sex  
350 chromosome, including elevated dN/dS ratios, increased levels of repetitive sequences and signals  
351 of strata of levels of sequence divergence [7, 8, 51]. Further work is required to understand the  
352 formation of the neo-sex system we infer. One relatively simple model is that one copy of  
353 chromosome 1A fused with the W chromosome, and the second copy of chromosome 1A became  
354 inherited in a neo-Z fashion; but more complicated scenarios are possible [7, 8, 15]. Given that the  
355 divergence between inland and coastal EYR lineages is partly due to a genomic region enriched for  
356 nuclear genes with mitochondrial functions that maps to the autosomal chromosome 1A in other  
357 songbirds [3] (Morales et al. 2018), the role of neo-sex chromosomes in maintaining lineage  
358 divergence despite nuclear gene flow warrants further investigation involving a female genome of  
359 the coastal lineage. Future work should also test whether unlikely but possible neoZ-1A  
360 differences between the EYR054 used for assembly here and EYR056 used for scaffolding  
361 affected the neo-Z assembly. Chromosome 1A is not one of the chromosomes implicated in  
362 multiple known vertebrate neo-sex systems [51], but given its unusual concentration of genes with  
363 mitochondrial functions, it will not be surprising if subsequent equivalent cases are found [3]. Our  
364 results show that assuming close synteny between a songbird of interest and a distantly-related  
365 reference genome can lead to incomplete or incorrect evolutionary inferences. The present genome  
366 assembly will be an important molecular resource for understanding and re-evaluating genome  
367 evolution in EYR, a key model wildlife species in the emerging field of ‘mitonuclear ecology’ [4].  
368 The discovery of neo-sex chromosomes in this bird species adds another, independent model to the  
369 limited number in which sex chromosome evolution can be studied through the lens of relatively  
370 young sex chromosomes [15, 51].

371 **Availability of supporting data**

372 The genome assembly has been deposited in the NCBI database with the accession number  
373 QKXG010000000. Raw sequencing data have been deposited in the NCBI Sequence Read Archive  
374 (SRA) database and linked to the Bioproject ID PRJNA476023. Additional supporting data,  
375 including the initial EYR054 MaSuRCA genome assembly (prior to scaffolding with EYR056  
376 mate-pair data), BUSCO calculations, genome annotations, candidate W- and Z-linked sequences,  
377 RaGOO scaffolding output and dN/dS ratio calculations are available via the GigaScience  
378 database, GigaDB [28].

379

### 380 **Competing interests**

381 The authors declare that they have no competing interests.

382

### 383 **Funding**

384 This study was funded by the Monash School of Biological Sciences, Australian Research Council  
385 (ARC) Discovery Project (DP180102359), ARC Linkage Grant (LP0776322), the Victorian  
386 Department of Sustainability and Environment (DSE), Museum of Victoria, Victorian Department  
387 of Primary Industries, Parks Victoria, North Central Catchment Management Authority, Goulburn  
388 Broken Catchment Management Authority, CSIRO Ecosystem Sciences, and the Australian  
389 National Wildlife Collection Foundation.

390

### 391 **Authors' contributions**

392 HMG, PS and AP conceived the study. HEM and SF collected the samples and extracted the  
393 genomic DNA. CMA contributed sequencing reagents and computing resources. HMG performed  
394 whole-genome sequencing, genome assembly, genome annotation and comparative genomics  
395 analysis. HEM assessed the assembly quality and genomics analysis. HMG, AP and PS wrote the  
396 manuscript. All authors read, edited and approved the final manuscript.

397

### 398 **Acknowledgments**

399 We thank Hans Zauner, Jason Sardell, Leonardo Campagna and Qi Zhou for comments that helped  
400 improve the manuscript. Thanks to Nevil Amos, Lana Austin and all other collectors of specimens  
401 and all agencies who granted permission to collect specimens. Field samples were collected under  
402 scientific research permits issued by the Victorian Department of Environment and Primary  
403 Industries (numbers 10007165, 10005919 and 10005514), New South Wales Office of  
404 Environment and Heritage (SL100886), in accordance with Animal Ethics approvals AM13-05,  
405 BSCI\_2012\_20 and BSCI\_2007\_07, using bands issued by the Australian Bird and Bat Banding



406 Scheme. We also thank the Australian National Wildlife Collection, Leo Joseph, Robert Palmer  
407 and Richard Major for providing genetic samples. We are grateful to Erich Jarvis and Olivier  
408 Fedrigo for giving us access to the female Zebra Finch assembly. We thank Gabriel Low for  
409 helpful discussion.

410

## 411 **Figure legends**

412

413 Figure 1. The Eastern Yellow Robin. Photo by Geoff Park

414

415 Figure 2. Genomic profiling and *in-silico* sexing of Eastern Yellow Robin. (A) Genomescope  
416 profile calculated from trimmed Illumina data of EYR054 using a *k*-mer length of 25. (B) Median  
417 coverage per individual for three sets of scaffolds with different inheritance, for the female sample  
418 (n=10) and male sample (n=9), with individuals sequenced at ~ 10× coverage each. Autosomal =  
419 GAPDH-containing chromosome fragment [1] scaffold QKXG0002030; W = W-chromosome  
420 fragment: scaffold QKXG0001703; Z = Z chromosome fragment: scaffold QKXG0001459. (C)  
421 Frequency distribution of base-by-base read-depth calculated from the mapping of pooled male  
422 (blue line) and female (red line) reads to the female genome assembly. This is subsequently used to  
423 estimate the read-depth of haploid and diploid scaffolds.

424

425 Figure 3. The assembled lengths of Eastern Yellow Robin (EYR) chromosome 1A, W and Z  
426 pseudomolecules constructed by anchoring different scaffold inputs to the female Zebra Finch  
427 reference genome (ZF; grey bars). Inputs included: EYR genome (EYR; yellow bars); EYR  
428 candidate W-linked scaffolds (EYR W-linked; red bars); EYR candidate Z-linked scaffolds (EYR  
429 Z-linked; dark blue bars); EYR genome without Z-linked scaffolds (EYR w/o Z-linked; pink bars);  
430 EYR genome without W-linked scaffolds (EYR w/o W-linked; light blue bars). Neo-sex-  
431 chromosome pseudomolecules were built using the latter two datasets (the length of neoW-1A is  
432 shown by the light blue bar and that of neoZ-1A by the light pink bar for Ch1A).

433

434 Figure 4. Read-depth of pooled male (blue dots) and pooled female (red dots) reads across EYR  
435 pseudomolecules neoW-1A, neoZ-1A, W, Z and autosomal chromosome 5. Read-depth (the  
436 number of reads for each nucleotide in the genome) was estimated for each 100 kb sliding window.  
437 The locations of candidate W-linked scaffolds on the neoW-1A and Z-linked scaffolds on neoZ-1A  
438 pseudomolecules are indicated by the black lines below the read-depth plots. Coordinate (Mb)  
439 refers to the position on the pseudomolecule.

440  
 441 Figure 5. Characterization of the inferred neo-sex chromosomes in Eastern Yellow Robin. Linear  
 442 genome comparison of the (A) neoW-1A and (B) neoZ-1A pseudomolecules (blue horizontal bars)  
 443 with the Zebra Finch chromosome 1A (green horizontal bars). The neoW-1A alignment is ~ 20 Mb  
 444 longer than that of neoZ-1A. The red lines denote regions of nucleotide similarity with more than  
 445 70% nucleotide identity calculated over 10 kb non-overlapping sliding window. (C) Pairwise  
 446 sequence identity per 10 kb sliding window (to obtain high resolution) between the neoW-1A and  
 447 neoZ-1A scaffolds mapped along the neoZ-1A pseudomolecule, with coordinates relating to the  
 448 neoZ-1A pseudomolecule. Zones of different levels of sequence similarity can be seen along the  
 449 pseudomolecule. The blue line denotes the smoothed conditional means for pairwise identity and  
 450 the grey zone around it indicates the 95% confidence interval. (D) Paired box plots showing the  
 451 dN/dS ratios of neoW-1A and neoZ-1A gene copies (gametologs) of the Eastern Yellow Robin  
 452 compared with Collared Flycatcher orthologs as references. Collared Flycatcher was used here in  
 453 preference to Zebra Finch because the former has greater protein similarity to EYR. Grey lines  
 454 connecting red and blue dots represent gametologs.

455

456 **Table 1**

457 Table 1. Genome assembly and annotation statistics of the Eastern Yellow Robin

| Parameter                  | Details                                                                                                                                       |
|----------------------------|-----------------------------------------------------------------------------------------------------------------------------------------------|
| Organism                   | <i>Eopsaltria australis</i> (Eastern Yellow Robin)                                                                                            |
| Isolate                    | EYR054 (sex = female; data type: Illumina standard paired-end and Nanopore long read)<br>EYR056 (sex = female; data type: Illumina mate-pair) |
| Bioproject                 | PRJNA476023                                                                                                                                   |
| Biosample                  | SAMN09425179 (isolate EYR054)<br>SAMN10581952 (isolate EYR056)                                                                                |
| GenBank assembly accession | GCA_003426825.1 (QKXG01)                                                                                                                      |
| Assembled Length           | 1,228,344,903 bp                                                                                                                              |
| Scaffold N <sub>50</sub>   | 987,278 bp                                                                                                                                    |

|                                          |        |
|------------------------------------------|--------|
| Number of scaffolds                      | 20,702 |
| Number of predicted protein-coding genes | 23,905 |

**Repeat Annotation:**

|                      |                       |
|----------------------|-----------------------|
| LINEs                | 39,888,415 bp (3.25%) |
| LTR elements         | 85,519,635 (6.96%)    |
| DNA elements         | 6,416,492 (0.52%)     |
| Unclassified repeats | 42,749,317 (3.48%)    |
| Satellites           | 1,967,923 (0.16%)     |
| Simple repeats       | 14,300,770 (1.16%)    |
| Low complexity       | 3,128,912 (0.25%)     |

| <b><u>BUSCO completeness (Ave odb9)</u></b> | <u>Whole genome</u> | <u>Predicted proteome</u> |
|---------------------------------------------|---------------------|---------------------------|
| Complete BUSCO                              | 4,627 (94.2%)       | 3,795 (77.2%)             |
| Complete and single-copy BUSCO              | 4,436 (90.3%)       | 3,302 (67.2%)             |
| Complete and duplicated BUSCO               | 191 (3.9%)          | 493 (10.0%)               |
| Fragmented BUSCO                            | 163 (3.3%)          | 590 (12.0%)               |
| Missing BUSCO                               | 125 (2.5%)          | 530 (10.8%)               |
| Total BUSCO groups search                   | 4,915               | 4,915                     |

---

458

459 **References**

460

- 461 1. Pavlova A, Amos JN, Joseph L, Loynes K, Austin JJ, Keogh JS, et al. Perched at the mito-nuclear  
462 crossroads: divergent mitochondrial lineages correlate with environment in the face of ongoing  
463 nuclear gene flow in an Australian bird. *Evolution*. 2013;67 12:3412-28.
- 464 2. Morales HE, Sunnucks P, Joseph L and Pavlova A. Perpendicular axes of differentiation generated  
465 by mitochondrial introgression. *Molecular ecology*. 2017;26 12:3241-55.

- 466 3. Morales HE, Pavlova A, Amos N, Major R, Kilian A, Greening C, et al. Concordant divergence of  
467 mitogenomes and a mitonuclear gene cluster in bird lineages inhabiting different climates. *Nature*  
468 *ecology & evolution*. 2018;2 8:1258.
- 469 4. Hill GE. *Mitonuclear ecology*. Oxford, United Kingdom: Oxford University Press; 2019.
- 470 5. Warren WC, Clayton DF, Ellegren H, Arnold AP, Hillier LW, Künstner A, et al. The genome of a  
471 songbird. *Nature*. 2010;464:757. doi:10.1038/nature08819
- 472 <https://www.nature.com/articles/nature08819#supplementary-information>.
- 473 6. Sunnucks P, Morales HE, Lamb AM, Pavlova A and Greening C. Integrative approaches for studying  
474 mitochondrial and nuclear genome co-evolution in oxidative phosphorylation. *Frontiers in*  
475 *genetics*. 2017;8:25.
- 476 7. Dierickx E, Sin S, van Veelen P, Brooke MdL, Liu Y, Edwards S, et al. Neo-sex chromosomes and  
477 demography shape genetic diversity in the Critically Endangered Raso lark. *bioRxiv*. 2019:617563.  
478 doi:10.1101/617563.
- 479 8. Leroy T, Anselmetti Y, Tilak M-K, Bérard S, Csukonyi L, Gabrielli M, et al. A bird's white-eye view on  
480 neosex chromosome evolution. *bioRxiv*. 2019:505610. doi:10.1101/505610.
- 481 9. Austin CM, Tan MH, Harrison KA, Lee YP, Croft LJ, Sunnucks P, et al. De novo genome assembly  
482 and annotation of Australia's largest freshwater fish, the Murray cod (*Maccullochella peelii*), from  
483 Illumina and Nanopore sequencing read. *Gigascience*. 2017;6 8:1-6.
- 484 10. Tan MH, Austin CM, Hammer MP, Lee YP, Croft LJ and Gan HM. Finding Nemo: hybrid assembly  
485 with Oxford Nanopore and Illumina reads greatly improves the clownfish (*Amphiprion ocellaris*)  
486 genome assembly. *GigaScience*. 2018;7 3:gix137.
- 487 11. Zimin AV, Puiu D, Luo M-C, Zhu T, Koren S, Marçais G, et al. Hybrid assembly of the large and  
488 highly repetitive genome of *Aegilops tauschii*, a progenitor of bread wheat, with the MaSuRCA  
489 mega-reads algorithm. *Genome research*. 2017.
- 490 12. Zimin AV, Puiu D, Hall R, Kingan S, Clavijo BJ and Salzberg SL. The first near-complete assembly of  
491 the hexaploid bread wheat genome, *Triticum aestivum*. *Gigascience*. 2017;6 11:1-7.  
492 doi:10.1093/gigascience/gix097.
- 493 13. Morales HE, Pavlova A, Joseph L and Sunnucks P. Positive and purifying selection in mitochondrial  
494 genomes of a bird with mitonuclear discordance. *Mol Ecol*. 2015;24 11:2820-37.  
495 doi:10.1111/mec.13203.
- 496 14. Sardell J. *Evolutionary Consequences of Recent Secondary Contact Between Myzomela*  
497 *Honeyeaters*. 2016.
- 498 15. Pala I, Naurin S, Stervander M, Hasselquist D, Bensch S and Hansson B. Evidence of a neo-sex  
499 chromosome in birds. *Heredity (Edinb)*. 2012;108 3:264-72. doi:10.1038/hdy.2011.70.
- 500 16. Brooke Mde L, Welbergen JA, Mainwaring MC, van der Velde M, Harts AM, Komdeur J, et al.  
501 Widespread translocation from autosomes to sex chromosomes preserves genetic variability in an  
502 endangered lark. *Journal of molecular evolution*. 2010;70 3:242-6. doi:10.1007/s00239-010-9333-  
503 3.
- 504 17. Harrison KA, Pavlova A, Amos JN, Takeuchi N, Lill A, Radford JQ, et al. Fine-scale effects of habitat  
505 loss and fragmentation despite large-scale gene flow for some regionally declining woodland bird  
506 species. *Landscape Ecology*. 2012;27 6:813-27. doi:10.1007/s10980-012-9743-2.
- 507 18. Morales HE, Pavlova A, Sunnucks P, Major R, Amos N, Joseph L, et al. Neutral and selective drivers  
508 of colour evolution in a widespread Australian passerine. *Journal of biogeography*. 2017;44 3:522-  
509 36.
- 510 19. Li H. Minimap2: pairwise alignment for nucleotide sequences. *Bioinformatics*. 2018;34 18:3094-  
511 100. doi:10.1093/bioinformatics/bty191.
- 512 20. Amos JN, Harrison KA, Radford JQ, White M, Newell G, Nally RM, et al. Species- and sex-specific  
513 connectivity effects of habitat fragmentation in a suite of woodland birds. *Ecology*. 2014;95  
514 6:1556-68. doi:10.1890/13-1328.1.
- 515 21. Griffiths R, Double MC, Orr K and Dawson RJ. A DNA test to sex most birds. *Molecular ecology*.  
516 1998;7 8:1071-5.

- 517 22. Chen S, Zhou Y, Chen Y and Gu J. fastp: an ultra-fast all-in-one FASTQ preprocessor.  
518 Bioinformatics. 2018;34 17:i884-i90. doi:10.1093/bioinformatics/bty560.
- 519 23. Marçais G and Kingsford C. A fast, lock-free approach for efficient parallel counting of occurrences  
520 of k-mers. Bioinformatics. 2011;27 6:764-70. doi:10.1093/bioinformatics/btr011.
- 521 24. Vurture GW, Sedlazeck FJ, Nattestad M, Underwood CJ, Fang H, Gurtowski J, et al. GenomeScope:  
522 fast reference-free genome profiling from short reads. Bioinformatics. 2017;33 14:2202-4.
- 523 25. Zimin AV, Marçais G, Puiu D, Roberts M, Salzberg SL and Yorke JA. The MaSuRCA genome  
524 assembler. Bioinformatics. 2013;29 21:2669-77.
- 525 26. Paulino D, Warren RL, Vandervalk BP, Raymond A, Jackman SD and Birol I. Sealer: a scalable gap-  
526 closing application for finishing draft genomes. BMC bioinformatics. 2015;16 1:230.
- 527 27. Sahlin K, Chikhi R and Arvestad L. Assembly scaffolding with PE-contaminated mate-pair libraries.  
528 Bioinformatics. 2016;32 13:1925-32.
- 529 28. Gan HM, Falk S, Morales HE, Austin CM, Sunnucks P and Pavlova A. Supporting data for "Genomic  
530 evidence of neo-sex chromosomes in the Eastern Yellow Robin". GigaScience Database. 2019.  
531 <http://dx.doi.org/10.5524/100639>
- 532 29. Waterhouse RM, Seppey M, Simão FA, Manni M, Ioannidis P, Klioutchnikov G, et al. BUSCO  
533 applications from quality assessments to gene prediction and phylogenomics. Molecular biology  
534 and evolution. 2017;35 3:543-8.
- 535 30. Smit AF, Hubley R and Green P. RepeatMasker. 1996.
- 536 31. Smit A and Hubley R. RepeatModeler Open-1.0. Available fom <http://www.repeatmasker.org>. 2008.
- 537 32. Ellegren H, Smeds L, Burri R, Olason PI, Backström N, Kawakami T, et al. The genomic landscape of  
538 species divergence in *Ficedula* flycatchers. Nature. 2012;491 7426:756.
- 539 33. Hoff KJ, Lange S, Lomsadze A, Borodovsky M and Stanke M. BRAKER1: unsupervised RNA-Seq-  
540 based genome annotation with GeneMark-ET and AUGUSTUS. Bioinformatics. 2015;32 5:767-9.
- 541 34. Langmead B and Salzberg SL. Fast gapped-read alignment with Bowtie 2. Nature methods. 2012;9  
542 4:357.
- 543 35. Lindenbaum P. Jvarkit: java-based utilities for Bioinformatics. 2015.
- 544 36. Lindenbaum P and Redon R. bioalcaide, samjs and vcfilterjs: object-oriented formatters and filters  
545 for bioinformatics files. Bioinformatics. 2018;34 7:1224-5. doi:10.1093/bioinformatics/btx734.
- 546 37. Li H, Handsaker B, Wysoker A, Fennell T, Ruan J, Homer N, et al. The Sequence Alignment/Map  
547 format and SAMtools. Bioinformatics. 2009;25 16:2078-9. doi:10.1093/bioinformatics/btp352.
- 548 38. Carvalho AB and Clark AG. Efficient identification of Y chromosome sequences in the human and  
549 *Drosophila* genomes. Genome research. 2013;23 11:1894-907. doi:10.1101/gr.156034.113.
- 550 39. Xu L, Auer G, Peona V, Suh A, Deng Y, Feng S, et al. Dynamic evolutionary history and gene content  
551 of sex chromosomes across diverse songbirds. Nat Ecol Evol. 2019;3 5:834-44.  
552 doi:10.1038/s41559-019-0850-1.
- 553 40. Alonge M, Soyk S, Ramakrishnan S, Wang X, Goodwin S, Sedlazeck FJ, et al. Fast and accurate  
554 reference-guided scaffolding of draft genomes. bioRxiv. 2019:519637. doi:10.1101/519637.
- 555 41. Quinlan AR and Hall IM. BEDTools: a flexible suite of utilities for comparing genomic features.  
556 Bioinformatics. 2010;26 6:841-2. doi:10.1093/bioinformatics/btq033.
- 557 42. Wickham H. ggplot2: Elegant Graphics for Data Analysis. Springer Publishing Company,  
558 Incorporated; 2009.
- 559 43. Jain C, Rodriguez-R LM, Phillippy AM, Konstantinidis KT and Aluru S. High throughput ANI analysis  
560 of 90K prokaryotic genomes reveals clear species boundaries. Nature communications. 2018;9  
561 1:5114.
- 562 44. Wright AE, Dean R, Zimmer F and Mank JE. How to make a sex chromosome. Nature  
563 communications. 2016;7:12087.
- 564 45. Emms DM and Kelly S. OrthoFinder: solving fundamental biases in whole genome comparisons  
565 dramatically improves orthogroup inference accuracy. Genome biology. 2015;16 1:157.
- 566 46. Rutkowska J, Lagisz M and Nakagawa S. The long and the short of avian W chromosomes: no  
567 evidence for gradual W shortening. Biology letters. 2012;8 4:636-8. doi:10.1098/rsbl.2012.0083.

- 568 47. Smeds L, Warmuth V, Bolivar P, Uebbing S, Burri R, Suh A, et al. Evolutionary analysis of the  
569 female-specific avian W chromosome. *Nature communications*. 2015;6:7330.
- 570 48. Charlesworth B. The effect of background selection against deleterious mutations on weakly  
571 selected, linked variants. *Genetical research*. 1994;63 3:213-27.
- 572 49. Charlesworth B and Charlesworth D. The degeneration of Y chromosomes. *Philos Trans R Soc Lond*  
573 *B Biol Sci*. 2000;355 1403:1563-72. doi:10.1098/rstb.2000.0717.
- 574 50. Bachtrog D. A dynamic view of sex chromosome evolution. *Current opinion in genetics &*  
575 *development*. 2006;16 6:578-85. doi:10.1016/j.gde.2006.10.007.
- 576 51. Sigeman H, Ponnikas S, Videvall E, Zhang H, Chauhan P, Naurin S, et al. Insights into Avian  
577 Incomplete Dosage Compensation: Sex-Biased Gene Expression Coevolves with Sex Chromosome  
578 Degeneration in the Common Whitethroat. *Genes*. 2018;9 8 doi:10.3390/genes9080373.
- 579 52. Sievers F and Higgins DG. Clustal Omega, accurate alignment of very large numbers of sequences.  
580 *Multiple sequence alignment methods*. Springer; 2014. p. 105-16.
- 581 53. Suyama M, Torrents D and Bork P. PAL2NAL: robust conversion of protein sequence alignments  
582 into the corresponding codon alignments. *Nucleic acids research*. 2006;34 suppl\_2:W609-W12.
- 583 54. Yang Z. PAML 4: phylogenetic analysis by maximum likelihood. *Molecular biology and evolution*.  
584 2007;24 8:1586-91.

585



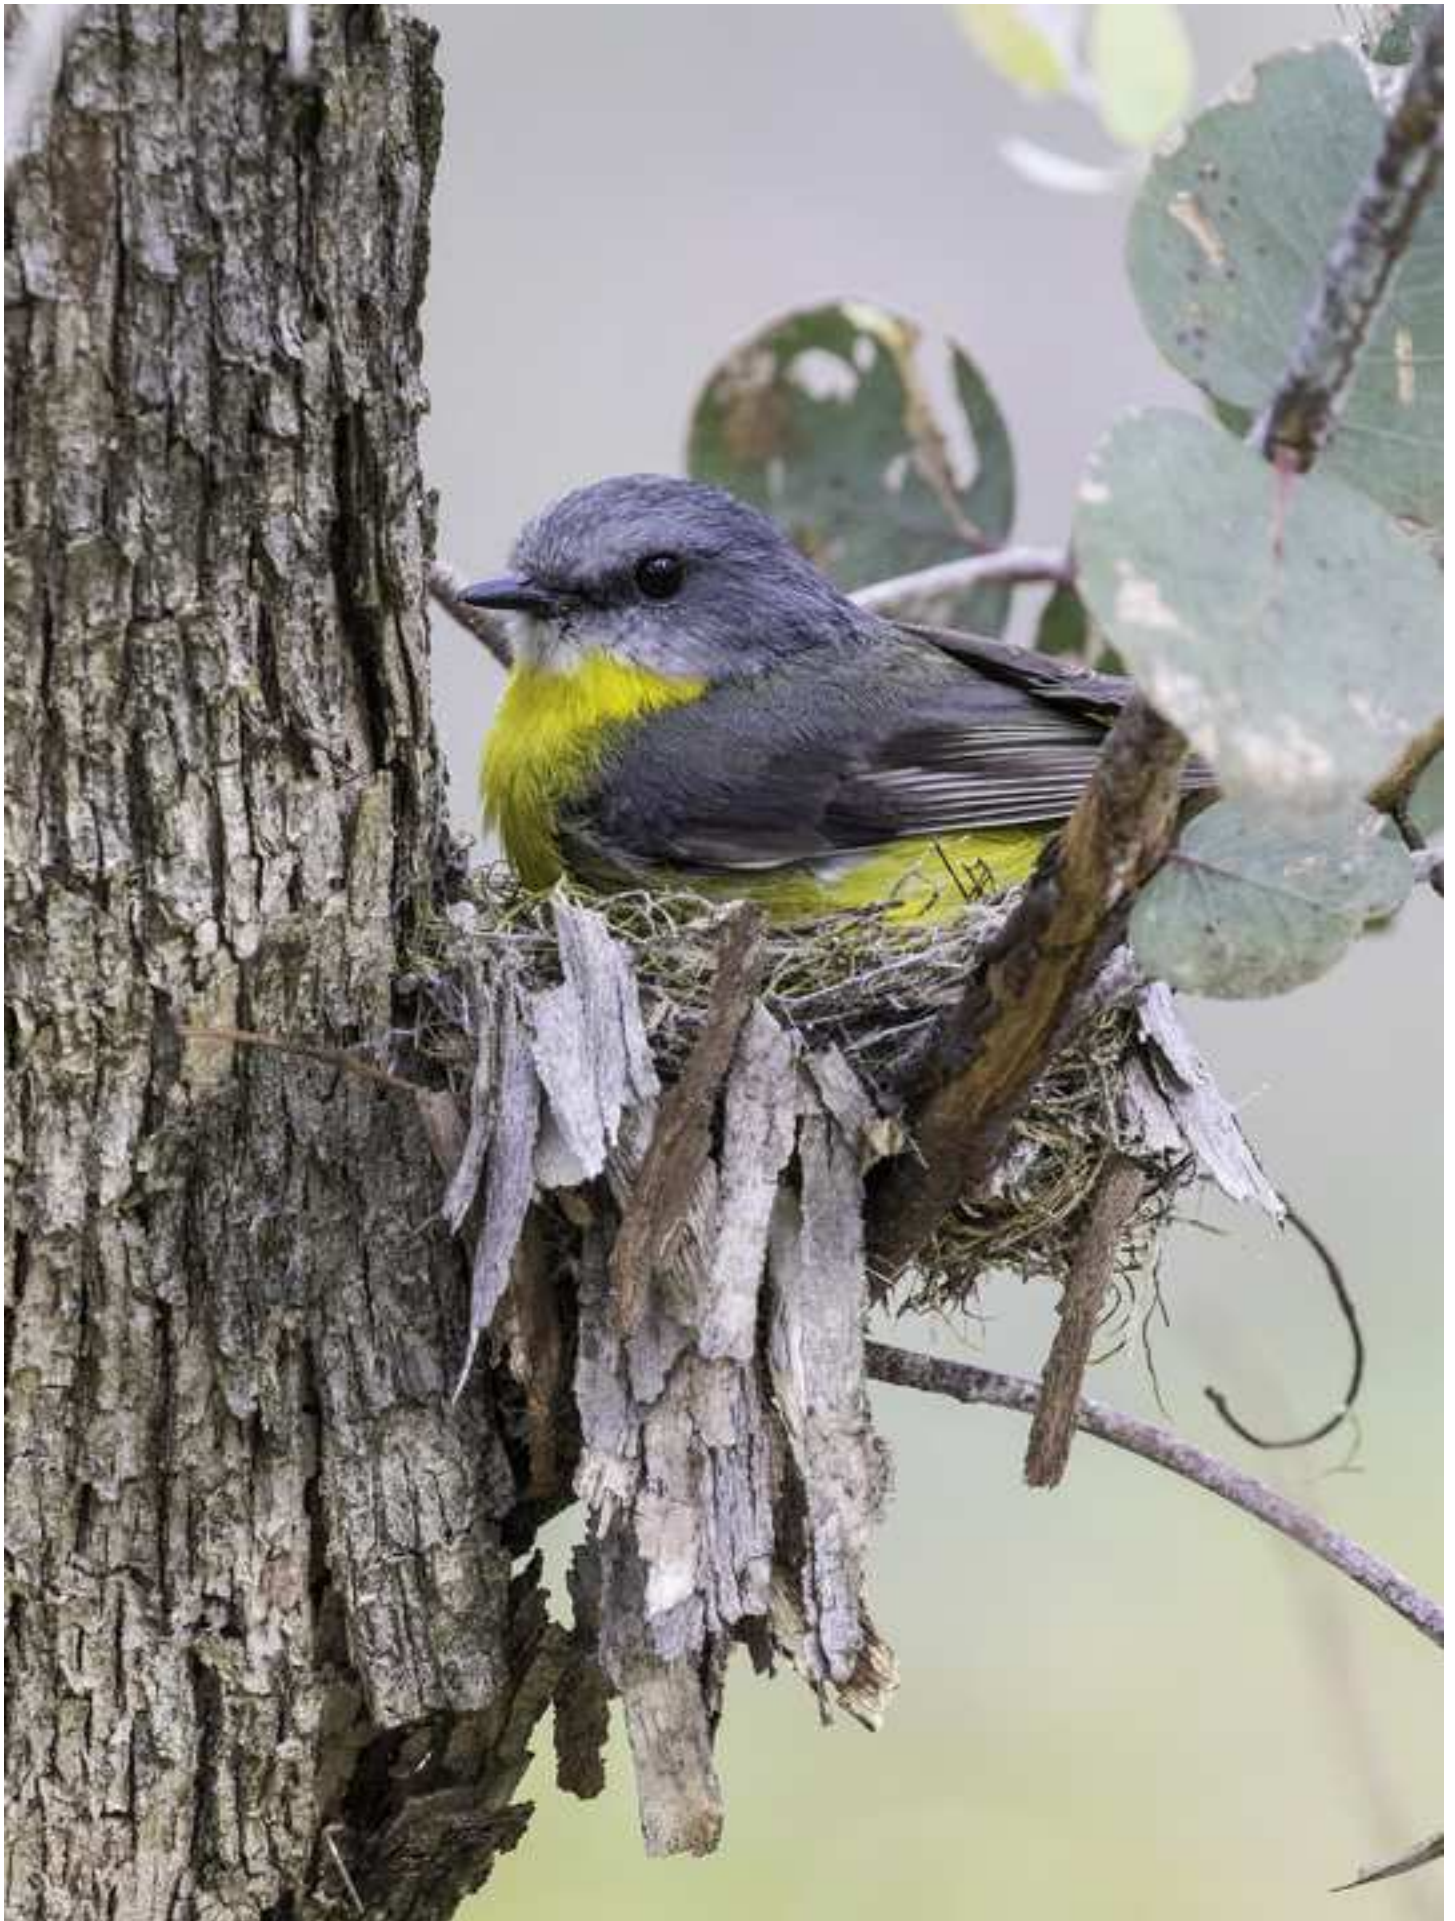

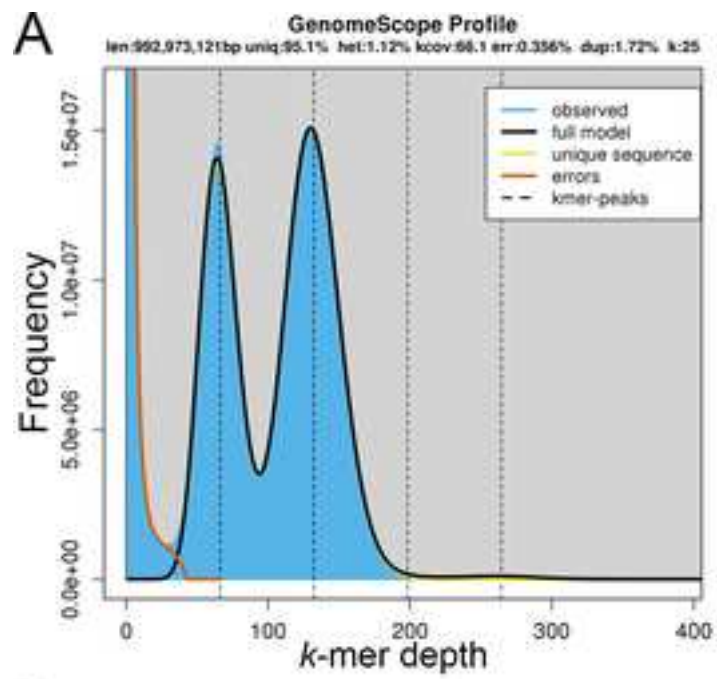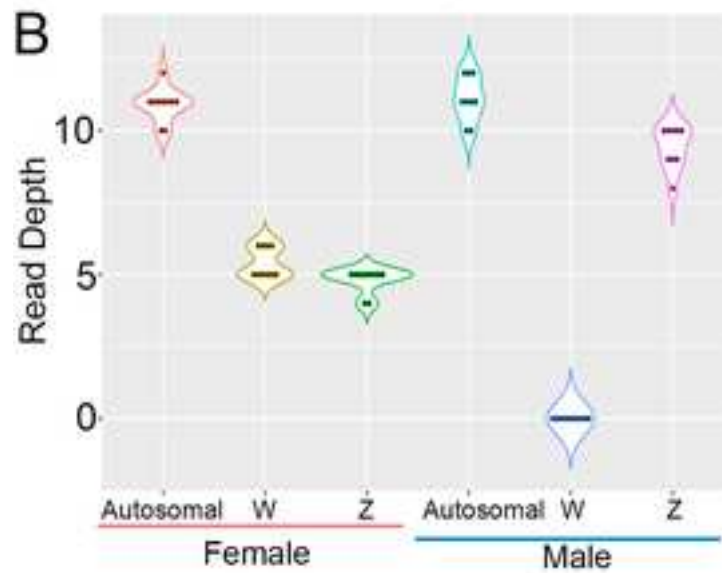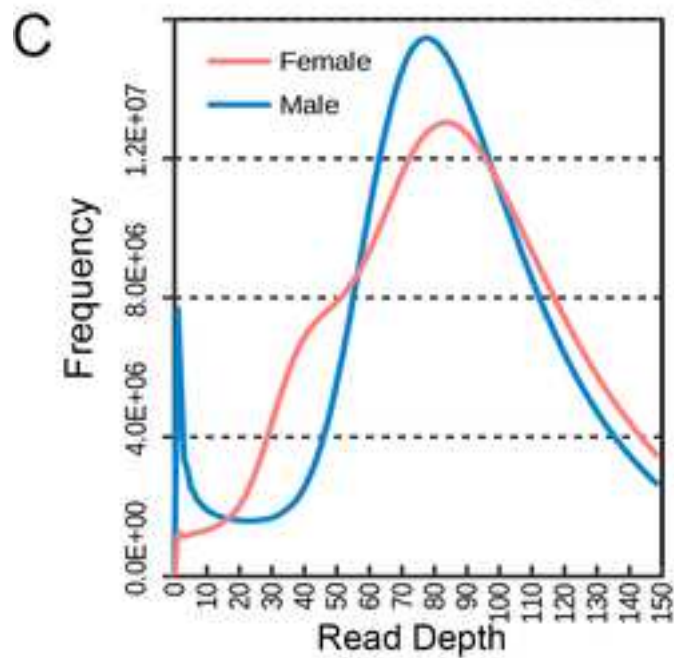



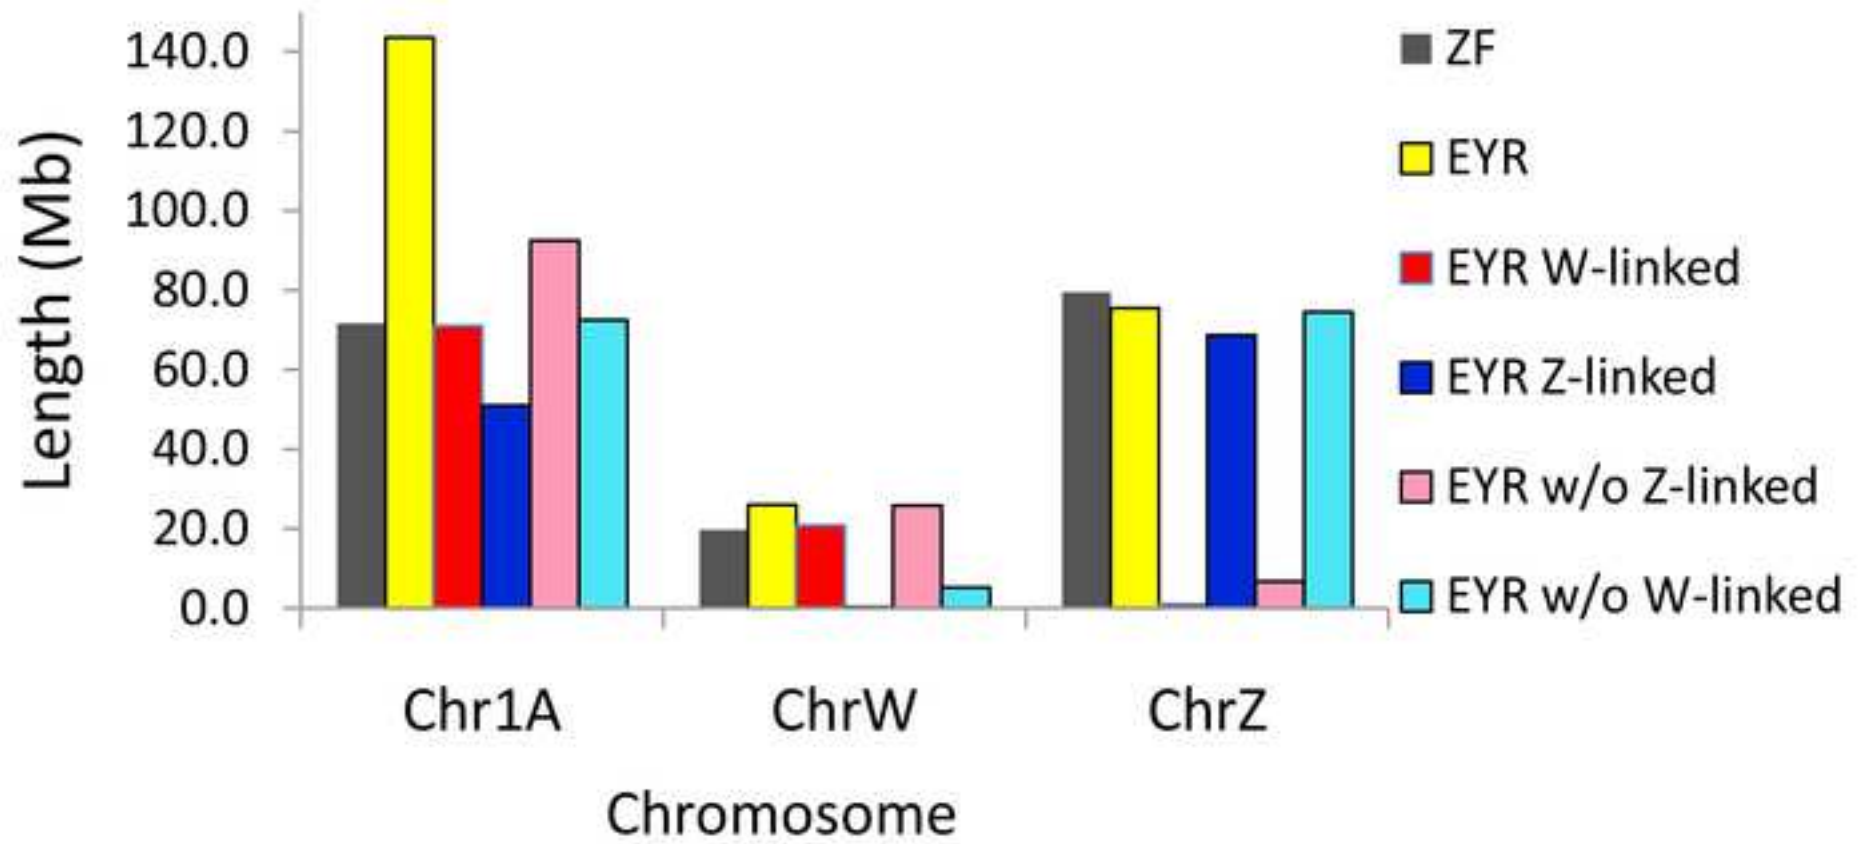

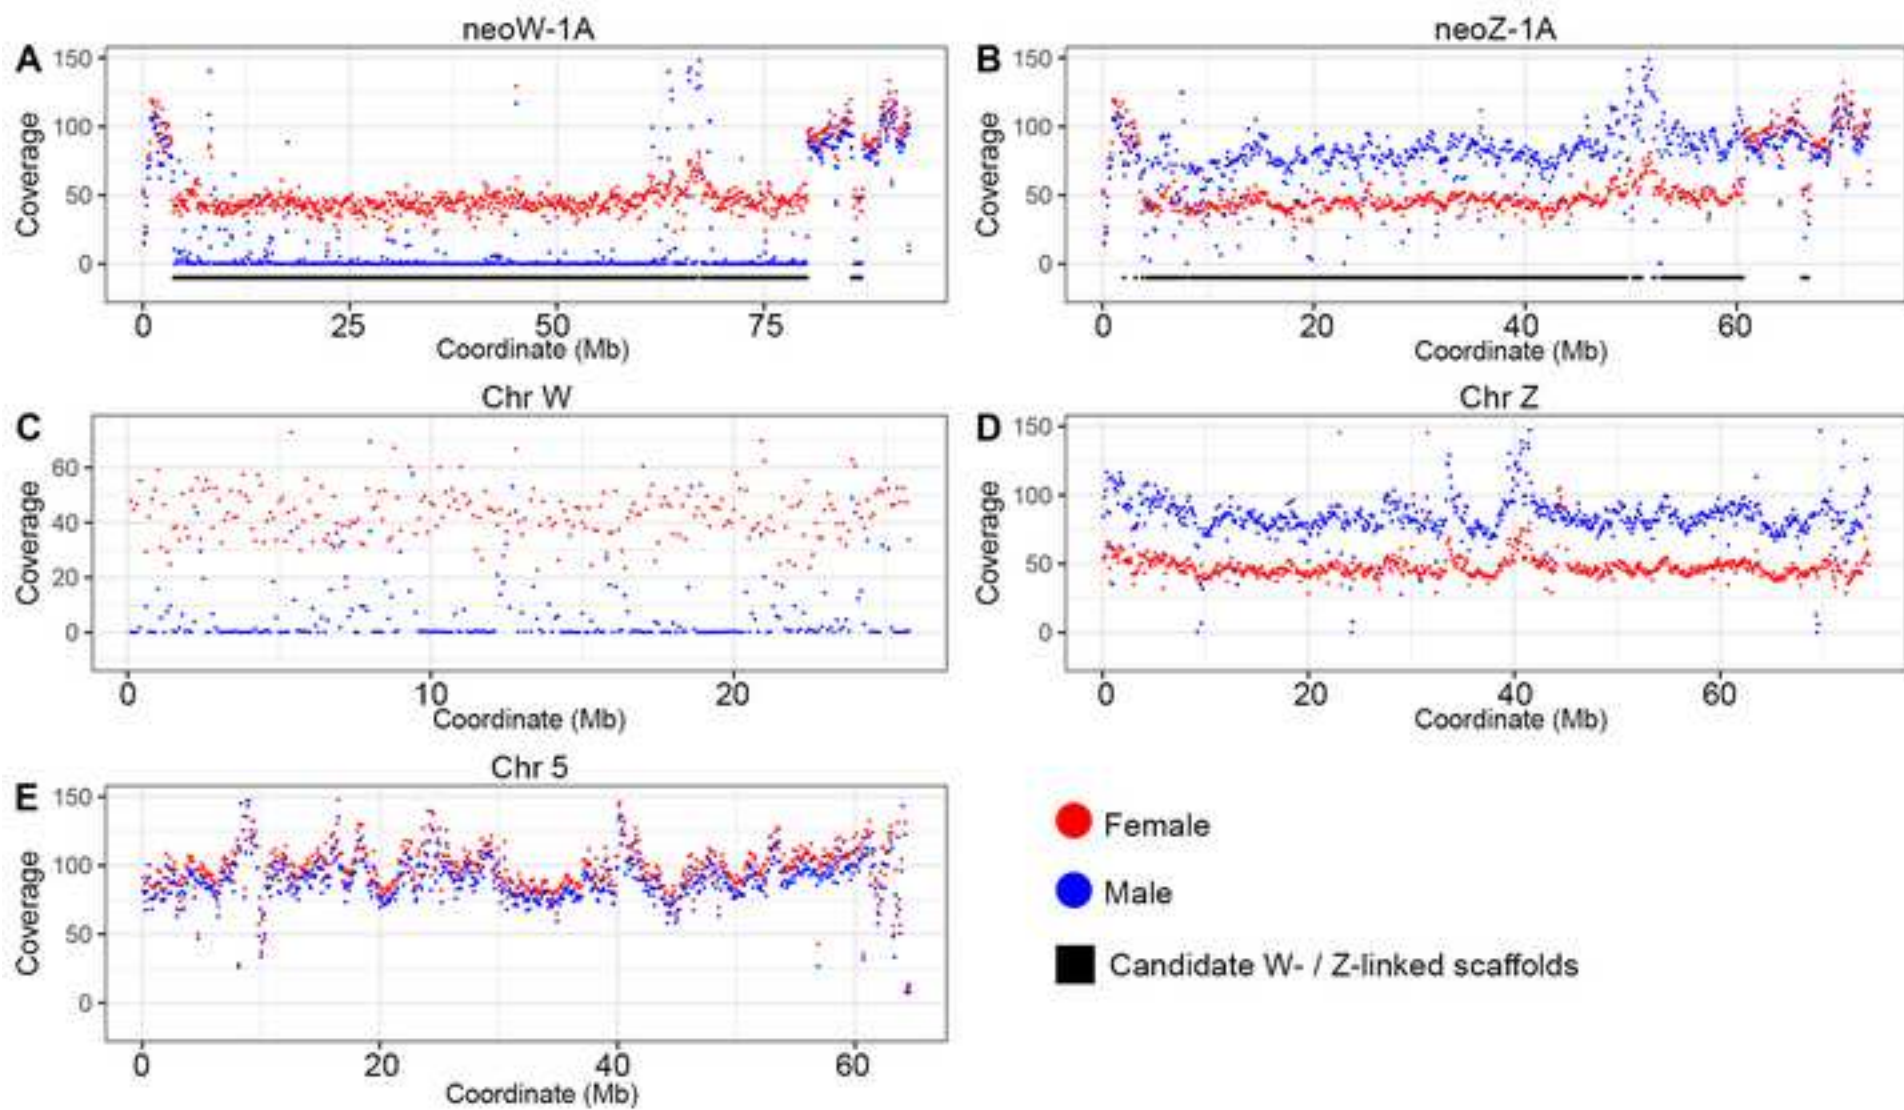

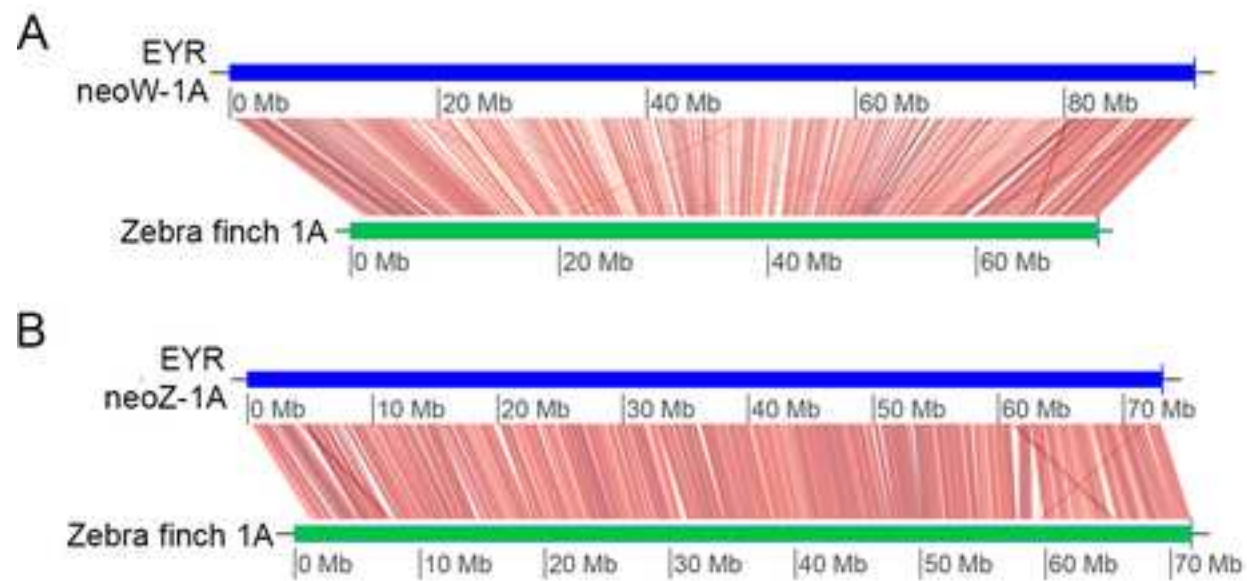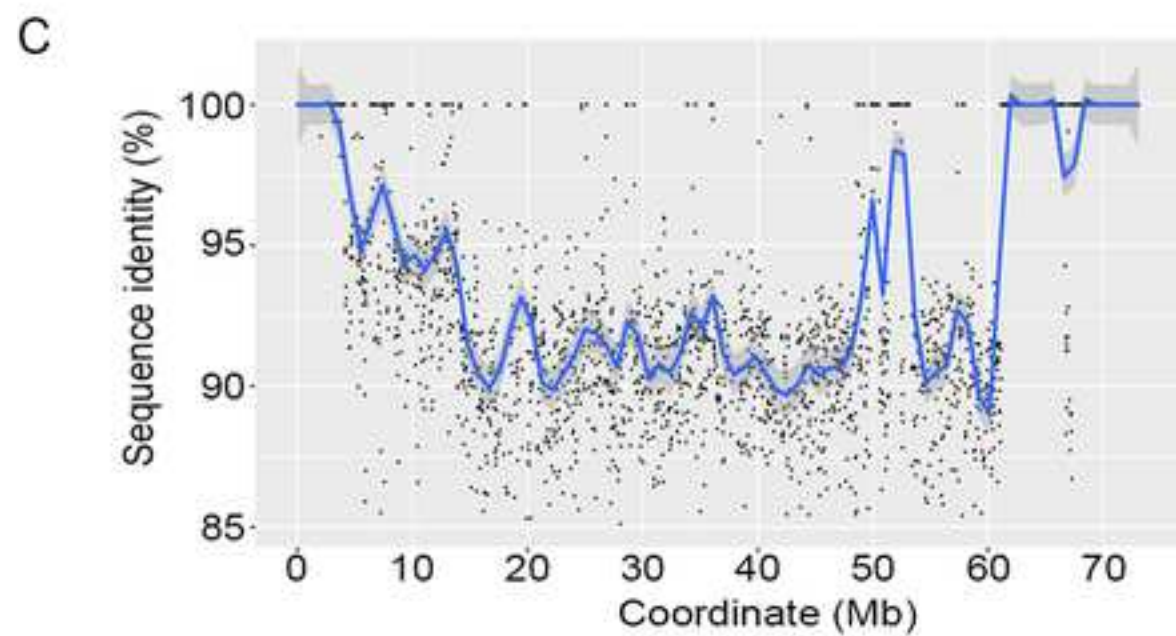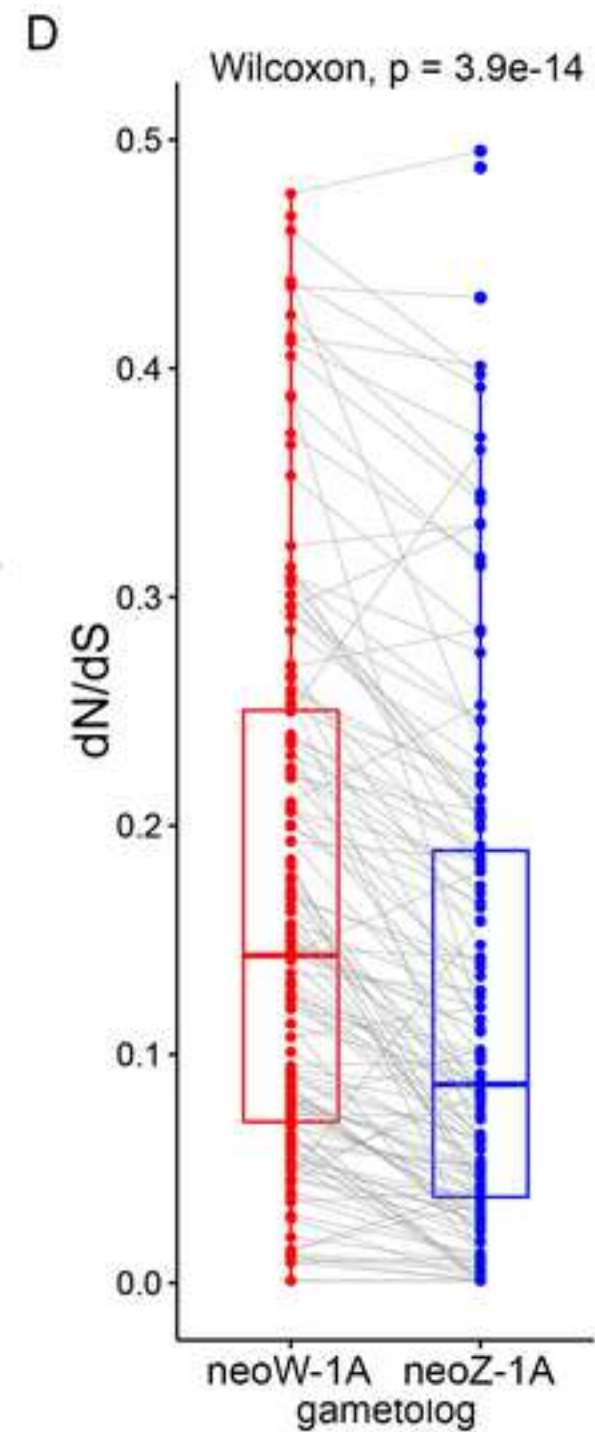

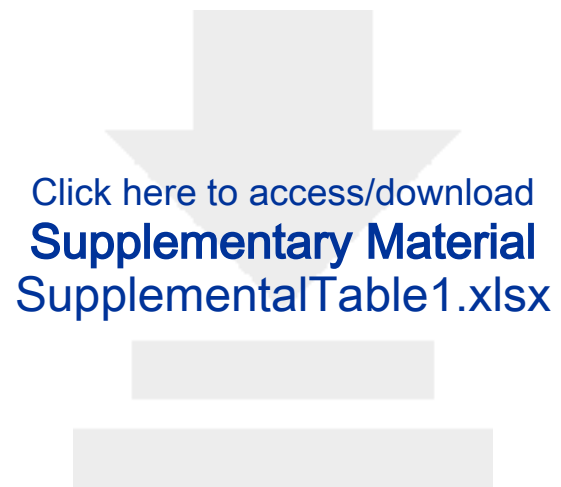

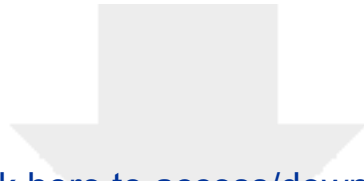

Click here to access/download  
**Supplementary Material**  
SupplementalTable2\_revised.xlsx

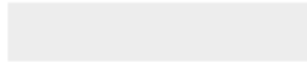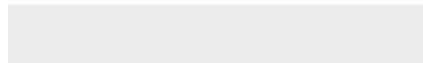

Supplement: giz111_giga-d-19-00237_revision_1.pdf [file giz111_giga-d-19-00237_revision_1.pdf]
